# Supplementary material for: Identification and Validation of New Stable QTLs for Grain Weight and Size by Multiple Mapping Models in Common Wheat
Source: Front Genet. 2020 Nov 11;11:584859. doi: 10.3389/fgene.2020.584859 (PMC7686802; doi:10.3389/fgene.2020.584859)
Supplement: Supplementary Table 3 — Primers used for cloning and marker development of TraesCS4B02G376400. [file Table_3.XLSX]

## Sheet: Sheet1
Table S3. Primers used for cloning partial TraesCS4B02G376400
Primer set	Primer sequence (5’-3’)	Amplified target	Size (bp)	Restriction enzyme
PMA-1	F: 5' CCAAGCACTGCCTATGTAGC 3'	Partial sequence of TraesCS4B01G376400	3166	-
	R: 5' TGCCCACGGTTCTGTCT 3'
PMA-2	F: 5' TTACCAGCCTCTGAGAAA 3'	CAPS marker of TraesCS4B01G376400	183	StyI
	R: 5' ATGATAGTGCGGAAACC 3'
