# Supplementary material for: Identification and Validation of New Stable QTLs for Grain Weight and Size by Multiple Mapping Models in Common Wheat
Source: Front Genet. 2020 Nov 11;11:584859. doi: 10.3389/fgene.2020.584859 (PMC7686802; doi:10.3389/fgene.2020.584859)
Supplement: Supplementary Table 8 — QTLs for grain weight and size identified in the Jing 411/Hongmangchun 21 RIL population. [file Table_8.XLSX]

## Sheet: Sheet1
Table S8. QTLs for TGW, GW, and GL identified in the Jing 411/Hongmangchun 21 RIL population
Trait	QTL	Physical Interval (Mb)b	Methodc	Marker	Peak Position (cM)	Year	LOD or P valued	PVEe (%)	Additive Effect	Reference
TGW	Qtgw.ahau-1B.1	648.1-652.1	ICIM	1B-JHHhaI, 1B-JHMfeI, 1B-JHDdeI	184.0-185.0	2006/2011/2018	3.27/3.39/4.38	6.9/5.4/8.0	2.23/1.58/1.46	Novel for TGW; Cui et al., 2014 (KNS)
			GCIM	1B-JHMfeI, 1B-JHDdeI	184.8-185.4	2011/2014/2017/2018	3.06/2.74/5.42/3.22	4.9/3.5/6.3/4.3	2.07/1.85/2.17/1.89
			NWIM	1B-JHDdeI, 1B-6615	187.2	2017	0	19.8	2.3739
	Qtgw.ahau-1B.2a	667.9-672.8	GCIM	1B-JHBSTEII, 1B7328	122.6-124.6	2012/2016	5.53/3.73	5.4/2.0	2.61/1.69	Li et al., 2019; Sukumaran et al., 2017; Cao et al., 2020
	Qtgw.ahau-1B.3a	674.9-683.2	ICIM	Marker23999357, Marker24208965	85	2018	3.6781	6.6568	1.3001	Li et al., 2019
	Qtgw.ahau-2A.1a	43.2-46.4	ICIM	2A-CAPSmin, Marker19527345, Marker18923997	104.0-106.0	2006/2008/2011	4.98/8.14/4.78	10.1/9.4/8.2	2.66/2.96/1.92	Novel
			GCIM	2A-3002, 2A-CAPSmin	95.1	2011/2016	2.94/4.33	3.6/4.0	1.58/2.37
	Qtgw.ahau-2A.2	299.6	GCIM	Marker19260856	174.1	2016	4.7131	3.3864	2.1878	Juliana et al., 2019
	Qtgw.ahau-2A.3a	544.2-781.8	ICIM	Marker18665074, Marker18681956, Marker18621613, Marker18516787	119.0-122.0	2007/2015	6.23/5.73	10.9/15.8	2.80/2.22	Sajjad et al., 2017; Li et al., 2019; Sukumaran et al., 2017; Xin et al., 2020 (TaFlo2-A1)
			GCIM	Marker18990150, Marker18462979	121.3-121.6	2007	4.5733	8.1939	2.9295
	Qtgw.ahau-2B.1	223.6-226.5	ICIM	Marker15889278, Marker15967470	41	2008	4.2573	4.5016	-2.0386	Cui et al., 2014
	Qtgw.ahau-2B.2a	708.6	GCIM	Marker15057293	5.8	2016	4.6821	2.1601	-1.7474	Liu et al., 2019
	Qtgw.ahau-2D	543.5-561.9	ICIM	Marker9258093, 2D-5137	60.0-62.0	2014/2017	3.27/6.45	8.5/8.2	2.03/2.03	Liu et al., 2018
			GCIM	Marker9258093, 2D-5137	61.5	2017	3.5224	4.9947	1.9353
			NWIM	Marker9258093, 2D-5137	61.3	2017	0	30.43	3.3367
	Qtgw.ahau-3A.1a	13.9-14.4	ICIM	Marker22551574, Marker23308353	94.0-95.0	2006/2008	5.45/5.01	11.4/5.4	2.83/2.24	Sukumaran et al., 2017; Xu et al., 2017
			GCIM	Marker22551574, Marker23308353	94.9	2018	3.3359	3.0262	1.5815
	Qtgw.ahau-3A.2a	37.6-38.1	ICIM	Marker22362498, Marker22937155	91.0-95.0	2018	5.2206	9.5877	1.5682	Novel for TGW; Liu et al., 2019 (KNS)
	Qtgw.ahau-3A.3	662.9-666.9	ICIM	Marker23018476, Marker22941486	54	2008	14.7893	18.7589	4.1876	Cui et al., 2014; Mohler et al., 2016
	Qtgw.ahau-3Ba	9.4-12.3	ICIM	Marker373057, Marker1103528	106	2011	10.2202	17.6462	2.8255	Juliana et al., 2019
			GCIM	Marker373057, Marker1103528	105.9-106.7	2006/2010	3.98/3.52	6.0/4.3	2.55/2.27
	Qtgw.ahau-4A.1	330.1	GCIM	TaTGW6-4A	0	2012	3.67	3.02	1.95	Hu et al., 2016a (TaTGW6-4A)
	Qtgw.ahau-4A.2a	629.6-700.7	ICIM	Marker2043488, Marker2760212, Marker2503359, Marker1884738	13.0-15.0	2014/2017	3.86/4.33	9.1/5.2	2.10/1.60	Cui et al., 2014; Juliana et al., 2019; Garcia et al., 2019
			GCIM	Marker2760212, Marker1884738	13.6-15.3	2015/2017/2016	3.10/4.44/2.52	5.6/4.5/1.1	1.90/1.84/1.21
	Qtgw.ahau-4B.1a	540.3-542.9	ICIM	Marker12906959, 4B-8885, 4B-8621, 4B-6505	34.0-44.0	2007/2012	14.74/5.05	29.3/9.6	4.77/1.97	Novel
			GCIM	4B-8621, 4B-6505	43.5	2007/2008	2.57/3.70	3.5/1.9	1.93/2.09
			NWIM	Marker12906959, 4B-8885	35	2010	0	17.84	4.1297
	Qtgw.ahau-4B.2a	660.1-660.4	ICIM	4B-2133, 4B-9051, 4B-8416	115.0-116.0	2006/2007/2008/2011/2012/2014/2015/2016/2017/2018	6.95/4.56/10.25/3.37/5.48/7.71/7.96/8.77/4.30/4.67	15.4/7.9/12.3/5.3/10.0/19.7/23.2/8.3/5.2/8.6	3.26/2.39/3.37/1.53/1.92/3.08/2.69/2.43/1.60/1.47	Novel
			GCIM	4B-9051, 4B-8416	115.2-116.2	2008/2015/2016/2018	2.80/5.16/8.63/3.45	2.6/15.0/5.3/3.2	2.30/3.10/2.74/1.63
			NWIM	4B-9051, 4B-8416	115.2	2016	0	33.89	5.7178
	Qtgw.ahau-4D	188.1-221.9	GCIM	Marker7505927	3.2	2015	3.7568	5.6472	1.901	Novel for TGW; Cui et al., 2014 (KNS)
			NWIM	Marker7201715, Marker7505927	2.6	2016	0	9.1	2.9992
	Qtgw.ahau-5A.1a	80.6-210.7	ICIM	Marker20415077, Marker20249312	13	2011	5.4799	8.8706	2.0037	Rehman et al., 2019; Xin et al., 2020 (TaSnRK2.9-5A)
			GCIM	Marker20415077	12.9	2006	5.68	11.605	3.5435
	Qtgw.ahau-5A.2a	461.3-473.1	ICIM	Marker19832964, Marker20079891	38	2014	4.17	9.3477	2.1831	Cui et al. 2014
			GCIM	Marker20079891, Marker20047757	39.2	2014	8.1753	6.001	3.2326
	Qtgw.ahau-5A.3a	559.3-596.6	ICIM	Marker20260250, Marker20877876	74	2010	5.4548	4.2397	2.2418	Cui et al., 2014; Yang et al., 2019a; Li et al., 2019 (TaGL3-5A)
			GCIM	Marker19675739	75	2016	3.5278	1.3578	1.3853
	Qtgw.ahau-6A	237.8	GCIM	TaGW2-6A	48.4	2015	3.2515	2.2394	1.1971	Simmonds et al., 2014; Su et al., 2012; Yang et al., 2012; Vandana et al., 2015; Hong et al., 2014; Qin et al., 2014; Wang et al., 2017; Sukumaran et al., 2017 (TaGW2-6A)
	Qtgw.ahau-6B.1	677.7-679.6	ICIM	6B-1809, 6B-9077	73	2012	4.2219	8.2164	1.7979	Li et al., 2019
			GCIM	6B-9077	73.3	2007	2.86	3.66	1.96
			NWIM	6B-9077, 6B-1891	73.4	2012	0	18.13	3.8229
	Qtgw.ahau-6B.2a	679.6-698.3	GCIM	Marker13891763, 6B-1809	53.3	2018	3.5592	1.7226	-1.1932	Cui et al., 2014; Mir et al., 2012
	Qtgw.ahau-7A.1a	99.7-200.5	ICIM	TaGASR1-7A, 7A-2981	105.0-107.0	2006/2007/2008/2011	6.86/3.07/9.20/6.28	17.2/5.4/11.9/11.0	3.60/2.07/3.43/2.29	Hou et al., 2014; Hu et al., 2016b; Wen et al., 2019 (TaSus1-7A; TaGASR7-A1; TaTGW-7A)
			GCIM	Marker17032922, TaGASR1-7A, 7A-2981	100.4-109.5	2006/2007/2008/2011/2012/2015/2016	5.24/3.39/4.49/4.67/3.64/7.05/3.52	11.2/8.8/4.1/9.2/2.2/16.8/2.9	3.48/3.03/3.07/2.84/1.65/3.28/2.02
	Qtgw.ahau-7A.2	446.4-496.9	ICIM	7A-3738, 7A-8123	123	2018	10.5024	20.6907	2.3034	Novel for TGW; Wang et al., 2017 (KNS)
			GCIM	7A-3738	122.8	2017	6.6562	8.2494	2.4871
	Qtgw.ahau-7B.1	139.5-337.4	ICIM	Marker3224627, Marker4079799, Marker3012061, Marker3816653	133.0-134.0	2010/2012/2016/2017	21.52/8.92/27.43/19.20	21.9/16.9/33.8/28.2	5.20/2.57/5.03/3.84	Cui et al., 2014
			GCIM	Marker3012061	133.5	2007/2008/2011/2012/2016	6.44/12.94/2.53/4.88/4.52	17.5/18.8/5.5/4.1/1.9	4.28/6.55/1.95/2.27/1.62
	Qtgw.ahau-7B.2a	417.4-434.1	ICIM	Marker2862753, Marker3789419	117	2010/2016/2017	16.93/15.77/8.06	15.9/16.5/10.1	-4.38/-3.47/-2.27	Cui et al., 2014
			GCIM	Marker2862753	116.9	2007/2008	4.13/9.95	12.3/14.7	-3.58/-5.80
	Qtgw.ahau-7D.1a	256.1-383.1	ICIM	Marker21557756, Marker21112876	25	2010	13.7196	12.2001	3.8472	Wang et al., 2012; Zhang et al., 2018
			GCIM	Marker21557756	24.1	2016	3.2738	2.0643	1.7082
	Qtgw.ahau-7D.2a	270.6-391.9	ICIM	Marker21928950, Marker21779125	13	2010	5.741	4.4611	-2.3047	Wang et al., 2012; Zhang et al., 2018
GW	Qgw.ahau-1Ba	649.1-660.3	ICIM	1B2148, 1B1710	174	2014	4.0377	10.6656	0.0845	Li et al., 2019
			GCIM	1B1710, 1B-JHBSTEII	175.5-182.2	2014/2016	3.40/5.93	8.0/5.3	0.09/0.08
	Qgw.ahau-2D.1a	272.5-420.5	ICIM	Marker9734399, Marker10019977	29	2016	5.889	7.3096	-0.0613	Mohler et al., 2016
			GCIM	Marker9268005	34.9	2008	3.0431	3.4596	0.0576
	Qgw.ahau-2D.2	479.4-493.4	ICIM	Marker9337980, Marker9839591	47	2016	12.8034	17.7058	0.0933	Mohler et al., 2016
			GCIM	Marker9839591	47.2	2016	7.4821	6.4084	0.0855
	Qgw.ahau-2D.3a	543.5-561.9	ICIM	Marker9258093, 2D-5137	62	2017	8.3586	13.9944	0.0907	Liu et al., 2018
			GCIM	Marker9258093, 2D-5137	60.54	2017	4.9817	14.6545	0.1032
			NWIM	Marker9258093, 2D-5137	60.6	2017	0	26.74	0.1235
	Qgw.ahau-3Ba	687.1-711.8	ICIM	Marker708465, Marker372801	18	2017	4.8456	7.5557	-0.0662	Mohler et al., 2016
			GCIM	Marker708465	18	2018	3.0884	3.1237	-0.0351
	Qgw.ahau-4A	629.6-630.8	ICIM	Marker2503359, Marker1884738	15	2017	6.8439	11.0608	0.0803	Mohler et al., 2016; Gao et al., 2015
			GCIM	Marker1884738	15.3	2017/2018	3.47/3.87	8.6/4.5	0.08/0.04
	Qgw.ahau-4B.1a	38.39-38.41	NWIM	Marker13223015, Marker13172883	4	2008	5e-06	12.35	0.0795	Gao et al., 2015
	Qgw.ahau-4B.2a	540.3-541.5	ICIM	4B-8621, 4B-6505	46	2008	3.6063	9.6496	0.0651	Novel
			GCIM	4B-8621, 4B-6505	43.5	2008/2018	2.58/4.86	7.6/8.0	0.07/0.06
	Qgw.ahau-4B.3a	660.11-660.13	ICIM	4B-9051, 4B-8416	116	2008/2016	4.21/14.27	11.0/20.7	0.06/0.10	Novel
			GCIM	4B-9051, 4B-8416	116.2	2008/2016	3.44/7.31	8.1/26.0	0.09/0.17
			NWIM	4B-9051, 4B-8416	115.2	2016	0	34.19	0.1698
	Qgw.ahau-4Da	226.4-409.4	ICIM	Marker7058787, Marker7285295, Marker7766282, Marker7477796	0.0-6.0	2016/2018	3.70/3.57	4.5/8.0	0.05/0.04	Quarrie et al., 2005; Huang et al., 2006
			GCIM	Marker7766282	5.8	2018	3.8612	6.2174	0.0496
	Qgw.ahau-5A	408.8-409.4	ICIM	Marker19829381, Marker20783644	26	2017	6.1946	10.0934	0.0779	Cui et al., 2014
	Qgw.ahau-5Ba	111.2	GCIM	Marker6146249	15.7	2014	3.062	6.3232	-0.0755	Novel
	Qgw.ahau-7A.1a	99.7-170.7	GCIM	TaGASR1-7A, 7A-2981	109.6	2008	3.7487	12.8733	0.1112	Hou et al., 2014; Dong et al., 2014; Cuthbert et al., 2008 (TaSus1-7A; TaGASR7-A1)
			NWIM	TaGASR1-7A, 7A-2981	77	2008	0	23.41	0.1421
	Qgw.ahau-7A.2	446.4-496.9	GCIM	7A-3738, 7A-8123	123.6	2017	4.8313	10.4415	0.0871	Novel for GW; Wang et al., 2017 (KNS)
	Qgw.ahau-7B	139.5-160.3	ICIM	Marker3012061, Marker3816653	134	2016	3.1354	3.7546	0.0436	Cui et al., 2014
GL	Qgl.ahau-1B.1	648.1-651.6	ICIM	1B-JHMfeI, 1B-JHDdeI	185	2016/2017	5.19/5.96	4.7/7.4	0.11/0.15	Novel for GL; Cui et al., 2014 (KNS)
			GCIM	1B-JHHhaI, 1B-JHMfeI	184.1-184.8	2016/2017	6.79/6.77	4.0/5.0	0.17/0.19
	Qgl.ahau-1B.2a	674.9-683.9	ICIM	Marker23999357, Marker24208965	85	2016/2017	6.33/3.63	5.8/4.4	0.12/0.12	Li et al., 2019; Sukumaran et al., 2017
	Qgl.ahau-1B.3	685.3-686.2	GCIM	Marker24516996, 1B-JHPVUII	89.3	2016	4.3037	2.3803	0.1313	Xin et al., 2020
	Qgl.ahau-2A.1a	44.2-54.4	ICIM	2A-CAPSmin, Marker19527345, Marker18923997, Marker18665074	105.0-107.0	2008/2014	8.96/6.54	15.5/13.8	0.21/0.25	Novel
			GCIM	2A-CAPSmin, Marker19527345	103.8	2008	6.4215	10.432	0.221
			NWIM	Marker19527345, 2A-CAPSmin	211	2018	0.007626	8.45	0.2469
	Qgl.ahau-2A.2a	200.6-208.8	GCIM	Marker15037185, Marker15835242	45.5-46.6	2008/2016	4.60/5.42	5.0527	-0.15/-0.10	Juliana et al., 2019
	Qgl.ahau-2A.3	400.6-407.3	ICIM	Marker18698534, Marker18792614	182	2017	4.1909	5.0863	-0.1251	Juliana et al., 2019
	Qgl.ahau-2B	208.1-210.0	ICIM	Marker14942394, Marker15692111	44	2008	4.2485	6.6421	-0.1338	Cui et al., 2014
	Qgl.ahau-2D	323.9-526.1	GCIM	Marker9955937, Marker9842701	32.5-42.0	2017	8.56	14.2598	0.3278	Mohler et al., 2016
	Qgl.ahau-3Aa	13.9-14.4	ICIM	Marker22551574, Marker23308353	95	2008	4.148	6.6393	0.1341	Sukumaran et al., 2017; Xu et al., 2017
			GCIM	Marker23308353	95.33	2008	4.2555	4.0241	0.1373
	Qgl.ahau-4B.1	31.3-38.4	ICIM	Marker13172883, Marker12582156	6	2016/2017	16.88/5.16	18.0/6.5	0.22/0.14	Garcia et al., 2019
			GCIM	Marker13172883, Marker12582156	6.3-7.2	2016/2017	4.75/3.68	5.3/2.1	0.20/0.12
			NWIM	Marker13172883, Marker12582156	6.4	2016	1e-05	11.91	0.1855
	Qgl.ahau-4B.2	540.3	GCIM	4B-8621	42.5	2016	10.3517	5.7142	0.2034	Novel
	Qgl.ahau-4B.3	599.3-639.1	GCIM	Marker12434495	57.4	2014	5.924	19.2275	0.3332	Huang et al., 2006
			NWIM	Marker12625969, Marker12699887	64	2018	0.026044	7.11	0.195
	Qgl.ahau-4B.4	660.11-660.13	ICIM	4B-9051, 4B-8416	117	2008	6.8452	12.3129	0.1819	Novel
	Qgl.ahau-6B	676.8-678.2	ICIM	6B-3358, 6B-9359, 6B-4055, 6B-6004	80.0-86.0	2008/2016/2017	3.11/5.79/4.75	4.8/5.3/5.8	0.12/0.12/0.14	Li et al., 2019
			GCIM	6B-9394	88	2017	3.1742	1.7343	0.1143
			NWIM	6B-4099, 6B-4848	91.8	2018	0.012687	7.72	0.2193
	Qgl.ahau-7A.1	99.7-200.5	ICIM	Marker17032922, TaGASR1-7A	104	2008	8.6291	14.3409	0.2049	Hou et al., 2014; Wen et al., 2019; Cuthbert et al., 2008 (TaSus1-7A; TaGASR7-A1)
			GCIM	TaGASR1-7A, 7A-2981	105.9	2008	9.1671	14.8613	0.2638
	Qgl.ahau-7A.2a	446.4-496.9	ICIM	7A-3738, 7A-8123	123	2016/2017/2018	11.43/15.88/3.75	11.3/22.8/9.7	0.17/0.27/0.38	Novel for GL; Wang et al., 2017 (KNS)
			GCIM	7A-3738	122.8	2017	5.5904	6.3205	0.2182
			NWIM	7A-3738, 7A-8123	63.2	2018	0.018228	9.53	0.2022
	Qgl.ahau-7A.3a	624.3-639.7	ICIM	Marker16737483, Marker16481120	10	2014	3.8913	12.232	0.2401	Juliana et al., 2019
			GCIM	Marker16737483, Marker16481120	11.2	2014	3.4027	11.6997	0.2599
	Qgl.ahau-7Ba	139.5-160.3	ICIM	Marker3012061, Marker3816653	134	2016	14.6349	15.7423	0.2035	Cui et al., 2014
			GCIM	Marker3816653	134.1	2016	6.8392	2.8177	0.1428
aThe same loci detected by QTL analysis in Jing411/Hongmangchun21 RIL population and GWAS in 192 wheat varieties; bThe physical positions of SNP markers based on wheat genome sequences from the International Wheat Genome Sequencing Consortium (IWGSC Ref Seq 1.0, http://www.wheatgenome.org/); cICIM indicates the inclusive composite interval mapping method performed by QTL IciMapping v4.1, GCIM ind…
